# Supplementary material
Source: MDPI journal article supplement (https://www.mdpi.com/2304-6740/1/1/3)
Supplement: s1 [file s1]

Supplementary Information

**Figure S1.** Far-IR spectrum of *18dbt*.


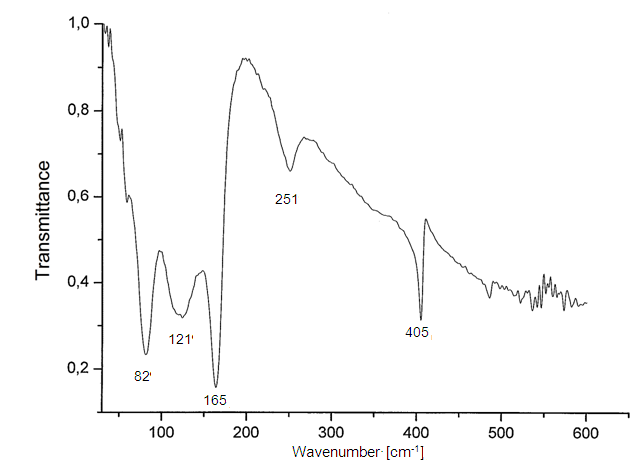


**Figure S2.** Mid-IR spectrum of *18dbt*.


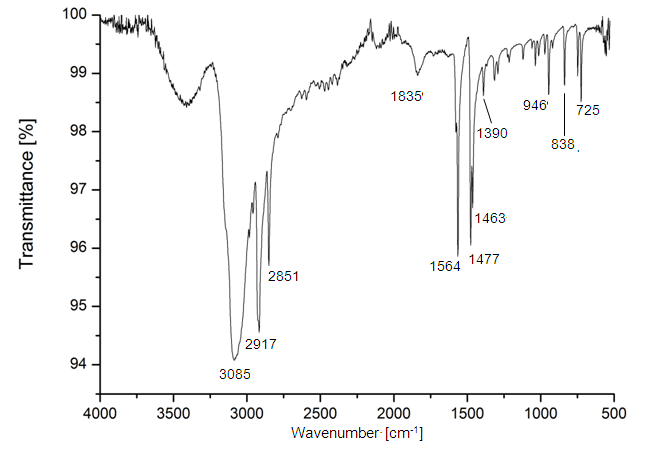


**Figure S3.** Raman spectrum of *18dbt* (The region between 4000 and 300 cm-1 is shown with an enlargement factor of 200.)


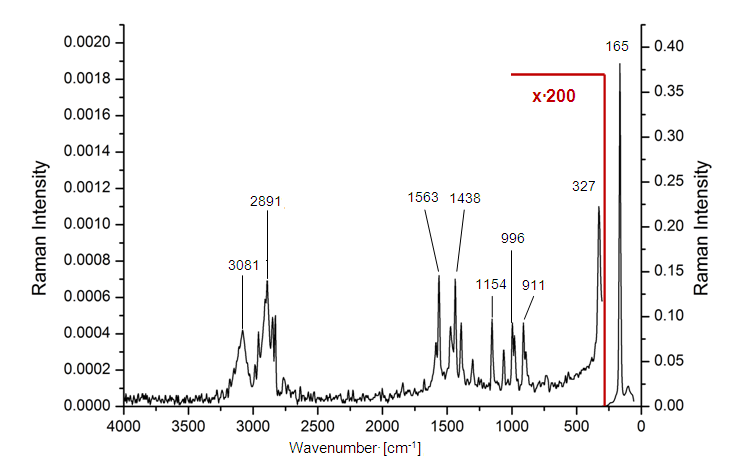


© 2013 by the authors; licensee MDPI, Basel, Switzerland. This article is an open access article distributed under the terms and conditions of the Creative Commons Attribution license (http://creativecommons.org/licenses/by/3.0/).
