# Supplementary material
Source: MDPI journal article supplement (https://www.mdpi.com/2304-6740/1/1/3)
Supplement: s2 [file s2]

data_DAOHI 
 
 
_audit_creation_method            SHELXL-97 
_chemical_name_systematic 
; 
 ? 
; 
_chemical_name_common             ? 
_chemical_melting_point           ? 
_chemical_formula_moiety          'C8 H22 N2, 2(I3)'
_chemical_formula_sum 	          'C8 H22 I6 N2' 
_chemical_formula_weight          907.68 
 
loop_ 
 _atom_type_symbol 
 _atom_type_description 
 _atom_type_scat_dispersion_real 
 _atom_type_scat_dispersion_imag 
 _atom_type_scat_source 
 'C'  'C'   0.0033   0.0016 
 'International Tables Vol C Tables 4.2.6.8 and 6.1.1.4' 
 'H'  'H'   0.0000   0.0000 
 'International Tables Vol C Tables 4.2.6.8 and 6.1.1.4' 
 'N'  'N'   0.0061   0.0033 
 'International Tables Vol C Tables 4.2.6.8 and 6.1.1.4' 
 'I'  'I'  -0.4742   1.8119 
 'International Tables Vol C Tables 4.2.6.8 and 6.1.1.4' 
 
_symmetry_cell_setting            triclinic
_symmetry_space_group_name_H-M    'P-1'
_symmetry_space_group_name_Hall   '-P 1'
loop_ 
 _symmetry_equiv_pos_as_xyz 
 'x, y, z' 
 '-x, -y, -z' 
 
_cell_length_a                    6.20008(14) 
_cell_length_b                    7.0452(2) 
_cell_length_c                    12.5770(3) 
_cell_angle_alpha                 76.531(2) 
_cell_angle_beta                  78.842(2) 
_cell_angle_gamma                 84.574(2) 
_cell_volume                      523.46(2) 
_cell_formula_units_Z             1 
_cell_measurement_temperature     100(1)  
_cell_measurement_reflns_used     12262
_cell_measurement_theta_min       2.9668
_cell_measurement_theta_max       32.2744

 
_exptl_crystal_description        'plate' 
_exptl_crystal_colour             'black-brown'

_exptl_crystal_size_max           0.4973
_exptl_crystal_size_mid           0.2828
_exptl_crystal_size_min           0.0180

_exptl_crystal_density_meas       ? 
_exptl_crystal_density_diffrn     2.879 
_exptl_crystal_density_method     'not measured' 
_exptl_crystal_F_000              402 
_exptl_absorpt_coefficient_mu     8.888 
_exptl_absorpt_correction_type    'analytical' 
_exptl_absorpt_correction_T_min   0.102
_exptl_absorpt_correction_T_max   0.850

 
 
_exptl_absorpt_process_details
;
CrysAlisPro, Oxford Diffraction Ltd., Version 1.171.34.44 
Analytical numeric absorption correction using a multifaceted 
crystal model based on expressions derived by 
R.C. Clark & J.S. Reid (Clark & Reid, 1995).  
;
 
_exptl_special_details 
; 
 ? 
; 
  
_diffrn_ambient_temperature       100(1) 
_diffrn_radiation_wavelength      0.71073 
_diffrn_radiation_type            MoK\a 
_diffrn_radiation_source          'fine-focus sealed tube' 
_diffrn_radiation_monochromator   graphite 
_diffrn_measurement_device_type   'Xcalibur, Eos' 
_diffrn_measurement_method        '\w scans' 
_diffrn_detector_area_resol_mean  16.2711
_diffrn_standards_number          ? 
_diffrn_standards_interval_count  ? 
_diffrn_standards_interval_time   ? 
_diffrn_standards_decay_%         0 
_diffrn_reflns_number             5489 
_diffrn_reflns_av_R_equivalents   0.0000 
_diffrn_reflns_av_sigmaI/netI     0.0183 
_diffrn_reflns_limit_h_min        -8 
_diffrn_reflns_limit_h_max        8 
_diffrn_reflns_limit_k_min        -9 
_diffrn_reflns_limit_k_max        9 
_diffrn_reflns_limit_l_min        -17 
_diffrn_reflns_limit_l_max        17 
_diffrn_reflns_theta_min          2.98 
_diffrn_reflns_theta_max          28.99 
_reflns_number_total              5489 
_reflns_number_gt                 5185 
_reflns_threshold_expression      >2sigma(I) 
 

_computing_data_collection
;
CrysAlisPro, Oxford Diffraction Ltd.,
Version 1.171.33.52 (release 06-11-2009 CrysAlis171 .NET)
;
_computing_cell_refinement
;
CrysAlisPro, Oxford Diffraction Ltd.,
Version 1.171.33.52 (release 06-11-2009 CrysAlis171 .NET)
;
_computing_data_reduction
;
CrysAlisPro, Oxford Diffraction Ltd.,
Version 1.171.33.52 (release 06-11-2009 CrysAlis171 .NET)
;

_computing_structure_solution     'SHELXS-97 (Sheldrick, 2008)' 
_computing_structure_refinement   'SHELXL-97 (Sheldrick, 2008)' 
_computing_molecular_graphics     ? 
_computing_publication_material   ? 
 
_refine_special_details 
; 
 Refinement of F^2^ against ALL reflections.  The weighted R-factor wR and 
 goodness of fit S are based on F^2^, conventional R-factors R are based 
 on F, with F set to zero for negative F^2^. The threshold expression of 
 F^2^ > 2sigma(F^2^) is used only for calculating R-factors(gt) etc. and is 
 not relevant to the choice of reflections for refinement.  R-factors based 
 on F^2^ are statistically about twice as large as those based on F, and R- 
 factors based on ALL data will be even larger. 
; 
 
_refine_ls_structure_factor_coef  Fsqd  
_refine_ls_matrix_type            full 
_refine_ls_weighting_scheme       calc  
_refine_ls_weighting_details 
 'calc w=1/[\s^2^(Fo^2^)+(0.015P)^2^+2.5P] where P=(Fo^2^+2Fc^2^)/3' 
_atom_sites_solution_primary      direct 
_atom_sites_solution_secondary    difmap 
_atom_sites_solution_hydrogens    geom 
_refine_ls_hydrogen_treatment     mixed 
_refine_ls_extinction_method      SHELXL 
_refine_ls_extinction_coef        0.0022(3) 
_refine_ls_extinction_expression 
 'Fc^*^=kFc[1+0.001xFc^2^\l^3^/sin(2\q)]^-1/4^' 
_refine_ls_number_reflns          5489 
_refine_ls_number_parameters      87 
_refine_ls_number_restraints      9 
_refine_ls_R_factor_all           0.0355 
_refine_ls_R_factor_gt            0.0341 
_refine_ls_wR_factor_ref          0.0888 
_refine_ls_wR_factor_gt           0.0885 
_refine_ls_goodness_of_fit_ref    1.668 
_refine_ls_restrained_S_all       1.667 
_refine_ls_shift/su_max           0.001 
_refine_ls_shift/su_mean          0.000 
 
loop_ 
 _atom_site_label 
 _atom_site_type_symbol 
 _atom_site_fract_x 
 _atom_site_fract_y 
 _atom_site_fract_z 
 _atom_site_U_iso_or_equiv 
 _atom_site_adp_type 
 _atom_site_occupancy 
 _atom_site_symetry_multiplicity 
 _atom_site_calc_flag 
 _atom_site_refinement_flags 
 _atom_site_disorder_assembly 
 _atom_site_disorder_group 
I1 I 0.20401(5) 0.24805(5) 0.45477(3) 0.01542(8) Uani 1 1 d . . . 
I2 I -0.12127(5) 0.34587(4) 0.28037(3) 0.01450(8) Uani 1 1 d . . . 
I3 I -0.39664(5) 0.42562(5) 0.12413(3) 0.01893(9) Uani 1 1 d . . . 
N1 N 0.6391(7) 0.2404(7) 0.6075(4) 0.0194(9) Uani 1 1 d D . . 
H11 H 0.672(7) 0.362(2) 0.604(3) 0.028(11) Uiso 1 1 d D . . 
H12 H 0.516(4) 0.239(7) 0.582(3) 0.028(11) Uiso 1 1 d D . . 
H13 H 0.752(5) 0.177(6) 0.572(3) 0.028(11) Uiso 1 1 d D . . 
C1 C 0.6047(8) 0.1366(7) 0.7276(4) 0.0166(9) Uani 1 1 d D . . 
H1A H 0.5795 0.0001 0.7346 0.020 Uiso 1 1 calc R . . 
H1B H 0.4767 0.1949 0.7685 0.020 Uiso 1 1 calc R . . 
C2 C 0.8077(8) 0.1533(7) 0.7748(4) 0.0163(9) Uani 1 1 d . . . 
H2A H 0.8274 0.2901 0.7701 0.020 Uiso 1 1 calc R . . 
H2B H 0.9357 0.1029 0.7299 0.020 Uiso 1 1 calc R . . 
C3 C 0.7938(8) 0.0416(7) 0.8962(4) 0.0152(9) Uani 1 1 d . . . 
H3A H 0.6678 0.0933 0.9416 0.018 Uiso 1 1 calc R . . 
H3B H 0.7723 -0.0951 0.9014 0.018 Uiso 1 1 calc R . . 
C4 C 1.0020(8) 0.0584(7) 0.9405(4) 0.0163(9) Uani 1 1 d . . . 
H4A H 1.0197 0.1949 0.9377 0.020 Uiso 1 1 calc R . . 
H4B H 1.1283 0.0124 0.8926 0.020 Uiso 1 1 calc R . . 
 
loop_ 
 _atom_site_aniso_label 
 _atom_site_aniso_U_11 
 _atom_site_aniso_U_22 
 _atom_site_aniso_U_33 
 _atom_site_aniso_U_23 
 _atom_site_aniso_U_13 
 _atom_site_aniso_U_12 
I1 0.01413(14) 0.01612(15) 0.01710(15) -0.00260(11) -0.00606(11) -0.00209(10) 
I2 0.01453(14) 0.01358(14) 0.01581(15) -0.00280(11) -0.00365(11) -0.00186(10) 
I3 0.02241(16) 0.01722(15) 0.01926(16) -0.00324(12) -0.01030(12) 0.00015(11) 
N1 0.019(2) 0.018(2) 0.022(2) -0.0003(17) -0.0105(17) -0.0029(16) 
C1 0.018(2) 0.012(2) 0.018(2) -0.0003(17) -0.0037(18) -0.0028(16) 
C2 0.013(2) 0.017(2) 0.021(2) -0.0061(18) -0.0040(18) -0.0020(16) 
C3 0.015(2) 0.017(2) 0.013(2) -0.0008(17) -0.0020(17) -0.0036(17) 
C4 0.015(2) 0.021(2) 0.012(2) -0.0015(18) -0.0004(17) -0.0044(17) 
 
_geom_special_details 
; 
 All esds (except the esd in the dihedral angle between two l.s. planes) 
 are estimated using the full covariance matrix.  The cell esds are taken 
 into account individually in the estimation of esds in distances, angles 
 and torsion angles; correlations between esds in cell parameters are only 
 used when they are defined by crystal symmetry.  An approximate (isotropic) 
 treatment of cell esds is used for estimating esds involving l.s. planes. 
; 
 
loop_ 
 _geom_bond_atom_site_label_1 
 _geom_bond_atom_site_label_2 
 _geom_bond_distance 
 _geom_bond_site_symmetry_2 
 _geom_bond_publ_flag 
I2 I3 2.7739(4) . ? 
N1 C1 1.500(6) . ? 
N1 H11 0.893(8) . ? 
N1 H12 0.885(8) . ? 
N1 H13 0.891(8) . ? 
C1 C2 1.516(6) . ? 
C1 H1A 0.9700 . ? 
C1 H1B 0.9700 . ? 
C2 C3 1.537(7) . ? 
C2 H2A 0.9700 . ? 
C2 H2B 0.9700 . ? 
C3 C4 1.526(6) . ? 
C3 H3A 0.9700 . ? 
C3 H3B 0.9700 . ? 
C4 C4 1.528(9) 2_757 ? 
C4 H4A 0.9700 . ? 
C4 H4B 0.9700 . ? 
 
loop_ 
 _geom_angle_atom_site_label_1 
 _geom_angle_atom_site_label_2 
 _geom_angle_atom_site_label_3 
 _geom_angle 
 _geom_angle_site_symmetry_1 
 _geom_angle_site_symmetry_3 
 _geom_angle_publ_flag 
C1 N1 H11 107(3) . . ? 
C1 N1 H12 108(3) . . ? 
H11 N1 H12 111(3) . . ? 
C1 N1 H13 107(3) . . ? 
H11 N1 H13 110(3) . . ? 
H12 N1 H13 112(3) . . ? 
N1 C1 C2 108.8(4) . . ? 
N1 C1 H1A 109.9 . . ? 
C2 C1 H1A 109.9 . . ? 
N1 C1 H1B 109.9 . . ? 
C2 C1 H1B 109.9 . . ? 
H1A C1 H1B 108.3 . . ? 
C1 C2 C3 112.9(4) . . ? 
C1 C2 H2A 109.0 . . ? 
C3 C2 H2A 109.0 . . ? 
C1 C2 H2B 109.0 . . ? 
C3 C2 H2B 109.0 . . ? 
H2A C2 H2B 107.8 . . ? 
C4 C3 C2 111.6(4) . . ? 
C4 C3 H3A 109.3 . . ? 
C2 C3 H3A 109.3 . . ? 
C4 C3 H3B 109.3 . . ? 
C2 C3 H3B 109.3 . . ? 
H3A C3 H3B 108.0 . . ? 
C3 C4 C4 113.0(5) . 2_757 ? 
C3 C4 H4A 109.0 . . ? 
C4 C4 H4A 109.0 2_757 . ? 
C3 C4 H4B 109.0 . . ? 
C4 C4 H4B 109.0 2_757 . ? 
H4A C4 H4B 107.8 . . ? 
 
loop_ 
 _geom_torsion_atom_site_label_1 
 _geom_torsion_atom_site_label_2 
 _geom_torsion_atom_site_label_3 
 _geom_torsion_atom_site_label_4 
 _geom_torsion 
 _geom_torsion_site_symmetry_1 
 _geom_torsion_site_symmetry_2 
 _geom_torsion_site_symmetry_3 
 _geom_torsion_site_symmetry_4 
 _geom_torsion_publ_flag 
N1 C1 C2 C3 -176.8(4) . . . . ? 
C1 C2 C3 C4 179.0(4) . . . . ? 
C2 C3 C4 C4 -177.5(5) . . . 2_757 ? 
 
loop_ 
 _geom_hbond_atom_site_label_D 
 _geom_hbond_atom_site_label_H 
 _geom_hbond_atom_site_label_A 
 _geom_hbond_distance_DH 
 _geom_hbond_distance_HA 
 _geom_hbond_distance_DA 
 _geom_hbond_angle_DHA 
 _geom_hbond_site_symmetry_A 
N1 H12 I1  0.885(8) 2.727(13) 3.592(4) 166(4) . 
N1 H11 I1  0.893(8) 2.810(12) 3.688(4) 168(4) 2_666 
N1 H13 I1  0.891(8) 2.93(3) 3.653(5) 139(4) 1_655 
 
_diffrn_measured_fraction_theta_max    1.000 
_diffrn_reflns_theta_full              28.99 
_diffrn_measured_fraction_theta_full   1.000 
_refine_diff_density_max    1.530 
_refine_diff_density_min   -1.058 
_refine_diff_density_rms    0.265 

   
_publ_section_references
;
Sheldrick, G. M. (2008). <i>Acta Cryst.</i> A<b>64</b>, 112--122.

Oxford Diffraction (2009). <i>CrysAlis PRO.</i> Versions 1.171., 
Oxford Diffraction Ltd., Oxford, UK.

Clark, R. C. & Reid, J. S. (1995). <i>Acta Cryst.</i> A<b>51<b>, 
887--897.
;
 
 
  
